# Supplementary material for: Methane mapping, emission quantification, and attribution in two European cities: Utrecht (NL) and Hamburg (DE)
Source: Copernicus journal article supplement (doi:10.5194/acp-20-14717-2020), 2020-12-07
Supplement: Supplementary file 1 [file acp-20-14717-2020-supplement.pdf]

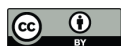

*Supplement of*

## **Methane mapping, emission quantification, and attribution in two European cities: Utrecht (NL) and Hamburg (DE)**

**Hossein Maazallahi et al.**

*Correspondence to:* Hossein Maazallahi ([h.maazallahi@uu.nl](mailto:h.maazallahi@uu.nl))

The copyright of individual parts of the supplement might differ from the CC BY 4.0 License.

## **Supplement**

**This section includes:**

**Supplementary Text**

**Supplementary Tables S1 to S14**

**Supplementary Figures S1 to S19**

**In this section the supporting documents related to the measurements and data evaluation are provided.**

## Table of Contents

|                                                                          |       |
|--------------------------------------------------------------------------|-------|
| S.1) Data collection and instrumentation.....                            | VI    |
| S.1.1) Mobile measurements.....                                          | VI    |
| S.1.2) Target cities.....                                                | VI    |
| S.1.3) Instruments comparison.....                                       | VIII  |
| S.1.4) Road data from Open Street Map (OSM) .....                        | IX    |
| S.1.5) Road visits.....                                                  | IX    |
| S.1.6) Measurements from facilities .....                                | IX    |
| S.1.7) Revisits; example of Utrecht city centre .....                    | X     |
| S.1.8) Air sample collection.....                                        | XI    |
| S.2) Data evaluation procedures of CH <sub>4</sub> quantification.....   | XII   |
| S.2.1) Background extraction.....                                        | XII   |
| S.2.2) Quantification of emissions from leak indications.....            | XII   |
| S.2.3) Cartesian system and clustering .....                             | XIII  |
| S.2.4) Code comparison with CSU.....                                     | XIV   |
| S.2.5) Quantification of emissions from facilities .....                 | XIV   |
| S.2.6) Unintended measurements .....                                     | XV    |
| S.2.7) Data evaluation procedures of isotopic analysis.....              | XVI   |
| S.3) Evaluations outcomes.....                                           | XVII  |
| S.3.1) Methane emission distribution over different road categories..... | XVII  |
| S.3.2) Emission per capita.....                                          | XVIII |
| S.3.3) Isotopic signature and ethane/methane ratio.....                  | XIX   |
| S.3.4) Measurements inside the New Elbe Tunnel .....                     | XX    |
| S.4) Standards, regulations, and LDC leak detection .....                | XXI   |
| S.4.1) Standards and regulations for local gas companies in Germany..... | XXI   |
| S.4.2) Measurement procedures by GasNetz Hamburg .....                   | XXII  |
| S.5) Gas Leak detection and repair.....                                  | XXIII |
| References in SI .....                                                   | XXIV  |

### List of Tables

|                                                                                                                                                                                                                                       |      |
|---------------------------------------------------------------------------------------------------------------------------------------------------------------------------------------------------------------------------------------|------|
| Table S1: Information about each day's mobile measurement surveys in Utrecht.....                                                                                                                                                     | VII  |
| Table S2: Information about each day's mobile measurement surveys in Hamburg.....                                                                                                                                                     | VII  |
| Table S3: Comparison of enhancements detected with the G2301 and G4302 instruments .....                                                                                                                                              | IX   |
| Table S4: Road category visits.....                                                                                                                                                                                                   | IX   |
| Table S5: Measurement from the waste water treatment plant in Utrecht (52.109791° N, 5.107605° E).....                                                                                                                                | IX   |
| Table S6: CH <sub>4</sub> measurements from facilities in Hamburg.....                                                                                                                                                                | IX   |
| Table S7: Local geographical datums in Utrecht and Hamburg.....                                                                                                                                                                       | XIII |
| Table S8: Statistics of observed LIs for different street categories in Hamburg and Utrecht. The three values per cell are the number of LIs, the total emission rate from all LIs in this category and the emission rate per LI..... | XVII |
| Table S9: Isotopic signature and ethane/methane (C <sub>2</sub> :C <sub>1</sub> ) ratio; North Elbe area in Hamburg .....                                                                                                             | XIX  |
| Table S10: Isotopic signature and C <sub>2</sub> :C <sub>1</sub> ratio from facilities in Hamburg .....                                                                                                                               | XIX  |
| Table S11: Inspection intervals of gas pipes in the ground (Table 2 in DVGW G465-1 (DVGW, 2018)).....                                                                                                                                 | XXI  |
| Table S12: Leak classes and action required .....                                                                                                                                                                                     | XXI  |
| Table S13: Distances of observed LIs from the natural gas distribution network grid.....                                                                                                                                              | XXII |
| Table S14: Pipeline materials at the locations of observed LIs.....                                                                                                                                                                   | XXII |



## List of Figures

|                                                                                                                                                                                                                                                                                                                                                           |       |
|-----------------------------------------------------------------------------------------------------------------------------------------------------------------------------------------------------------------------------------------------------------------------------------------------------------------------------------------------------------|-------|
| Figure S1: Mobile measurement platform .....                                                                                                                                                                                                                                                                                                              | VI    |
| Figure S2: Mobile measurement in (a) Utrecht and (b) Hamburg.....                                                                                                                                                                                                                                                                                         | VI    |
| Figure S3: (a) Example of raw data and data quality check of G4302, (b) timeseries of CH <sub>4</sub> mole fraction recorded by G2301 and G4302, (c) in-situ measurement correlation plot of G2301 and G4302 while the G4302 was in ethane mode, and (d) in-situ measurement correlation plot of G2301 and G4302 while the G4302 was in methane mode..... | VIII  |
| Figure S4: Construction at the street level; (a) not possible to access the total width or (b) streets were completely blocked .....                                                                                                                                                                                                                      | X     |
| Figure S5: Mobile measurement across city centre of Utrecht in February 2018 (red) and April 2019 (green) ...                                                                                                                                                                                                                                             | X     |
| Figure S6: Taking samples (a) inside the car or (a) outside .....                                                                                                                                                                                                                                                                                         | XI    |
| Figure S7: Background extraction of (a) CO <sub>2</sub> and (b) CH <sub>4</sub> ; example of a survey in Hamburg .....                                                                                                                                                                                                                                    | XII   |
| Figure S8: Flow diagrams for the evaluating CH <sub>4</sub> emissions of leak indications.....                                                                                                                                                                                                                                                            | XII   |
| Figure S9: Emission locations and clusters. (a) All LIs and clusters in the target area, (b) LIs and clusters in a smaller region, (c) complete view of each day's surveys across Hamburg, and (d) focus of each day's surveys across city centre of Hamburg .....                                                                                        | XIII  |
| Figure S10: Comparison of evaluation code from UU and CSU .....                                                                                                                                                                                                                                                                                           | XIV   |
| Figure S11: Flow diagrams for the evaluating CH <sub>4</sub> emissions of facilities.....                                                                                                                                                                                                                                                                 | XIV   |
| Figure S12: Exhaust measurement from a car; (a) timeseries of CH <sub>4</sub> and CO <sub>2</sub> mole fractions from G2301, (b) timeseries of CH <sub>4</sub> and C <sub>2</sub> H <sub>6</sub> mole fractions from G4302, and (c) the CH <sub>4</sub> excess track of measurement while following the car .....                                         | XV    |
| Figure S13: Flow diagram for isotope analysis.....                                                                                                                                                                                                                                                                                                        | XVI   |
| Figure S14: Population distribution in (a) Utrecht and (b) Hamburg .....                                                                                                                                                                                                                                                                                  | XVIII |
| Figure S15: (a) CH <sub>4</sub> enhancements in the southern part of the Alster in Hamburg, the LIs inside the white polygon were attributed to a microbial source, and (b) the photograph shows an exhaust from the sewage system that was identified as strong CH <sub>4</sub> source .....                                                             | XIX   |
| Figure S16: In situ measurements from G2301 during driving inside the new Elbe tunnel; (a) on 07 November 2018, (b) on 09 November 2018 including signatures from isotopic sampling analysis, (c) on 10 November 2018, and (d) CH <sub>4</sub> :CO <sub>2</sub> ratio of enhancements inside the tunnel .....                                             | XX    |
| Figure S17: (a) Example of concomitant CH <sub>4</sub> and CO <sub>2</sub> enhancements for a LI measured with the G2301 instrument and (b) CH <sub>4</sub> and CO <sub>2</sub> correlations for the LIs attributed to combustion sources in Hamburg.....                                                                                                 | XX    |
| Figure S18: Leak detection operation by GasNetz Hamburg.....                                                                                                                                                                                                                                                                                              | XXII  |
| Figure S19: Gas detection and repair practices flowchart.....                                                                                                                                                                                                                                                                                             | XXIII |

## Acronyms, Chemical Symbols and Scientific Units

|                                    |                                                                                                                                         |
|------------------------------------|-----------------------------------------------------------------------------------------------------------------------------------------|
| <b>ACM</b>                         | Authority for Consumers and Markets in the Netherlands                                                                                  |
| <b>bcm</b>                         | billion cubic meters                                                                                                                    |
| <b>°C</b>                          | degree Celsius                                                                                                                          |
| <b>C<sub>2</sub>:C<sub>1</sub></b> | Ethane to Methane Enhancements Ratio                                                                                                    |
| <b>C<sub>2</sub>H<sub>6</sub></b>  | Ethane                                                                                                                                  |
| <b>CCAC</b>                        | Climate and Clean Air Coalition                                                                                                         |
| <b>CH<sub>4</sub></b>              | Methane                                                                                                                                 |
| <b>CO<sub>2</sub></b>              | Carbon Dioxide                                                                                                                          |
| <b>CSU</b>                         | Colorado State University                                                                                                               |
| <b>DBI GUT Leipzig</b>             | DBI Gas- und Umwelttechnik GmbH Leipzig                                                                                                 |
| <b>DE</b>                          | Deutschland                                                                                                                             |
| <b>DVGW</b>                        | Deutscher Verein des Gas-und Wasserfaches                                                                                               |
| <b>EDF</b>                         | Environmental Defense Fund                                                                                                              |
| <b>EIA</b>                         | Energy Information Administration                                                                                                       |
| <b>GHG</b>                         | Greenhouse Gas                                                                                                                          |
| <b>GIS</b>                         | Geographic Information System                                                                                                           |
| <b>GPDM</b>                        | Gaussian Plume Dispersion Model                                                                                                         |
| <b>GPS</b>                         | Global Positioning System                                                                                                               |
| <b>H<sub>2</sub>O</b>              | Water                                                                                                                                   |
| <b>Hz</b>                          | Hertz                                                                                                                                   |
| <b>ICOS</b>                        | Integrated Carbon Observation System                                                                                                    |
| <b>IMAU</b>                        | Institute for Marine and Atmospheric research Utrecht                                                                                   |
| <b>KNMI</b>                        | Koninklijk Nederlands Meteorologisch Instituut                                                                                          |
| <b>L</b>                           | Liter                                                                                                                                   |
| <b>LBEG</b>                        | Landesamt für Bergbau, Energie und Geologie                                                                                             |
| <b>LDC</b>                         | Local Distribution Company (for natural gas consumption)                                                                                |
| <b>LI</b>                          | Leak Indication: spatially clustered and temporally aggregated locations of methane enhancements which are >10 % above background level |
| <b>mbar</b>                        | millibar                                                                                                                                |
| <b>ml</b>                          | milliliter                                                                                                                              |
| <b>MEMO<sup>2</sup></b>            | Methane goes Mobile–Measurements and Modelling                                                                                          |
| <b>MI</b>                          | Meteorological Institute                                                                                                                |
| <b>MPI-Met</b>                     | Max-Planck Institute for Meteorology                                                                                                    |
| <b>NGDN</b>                        | Natural Gas Distribution Network                                                                                                        |
| <b>NL</b>                          | The Netherlands                                                                                                                         |
| <b>OH</b>                          | Hydroxyl radical                                                                                                                        |
| <b>OSM</b>                         | Open Street Map                                                                                                                         |
| <b>ppb</b>                         | parts per billion                                                                                                                       |
| <b>ppm</b>                         | parts per million                                                                                                                       |
| <b>RHUL</b>                        | Royal Holloway University of London                                                                                                     |
| <b>RIVM</b>                        | Rijksinstituut voor Volksgezondheid en Milieu                                                                                           |
| <b>t</b>                           | tons                                                                                                                                    |
| <b>u</b>                           | wind speed                                                                                                                              |
| <b>UBA</b>                         | Umweltbundesamt                                                                                                                         |
| <b>UU</b>                          | Utrecht University                                                                                                                      |
| <b>US</b>                          | The United States                                                                                                                       |
| <b>UTC</b>                         | Coordinated Universal Time                                                                                                              |
| <b>V</b>                           | volts                                                                                                                                   |
| <b>WWTP</b>                        | Waste Water Treatment Plant                                                                                                             |
| <b>yr</b>                          | Year                                                                                                                                    |
| <b>δ<sup>13</sup>C</b>             | δ <sup>13</sup> C-CH <sub>4</sub>                                                                                                       |
| <b>δD</b>                          | δ <sup>2</sup> H-CH <sub>4</sub>                                                                                                        |
| <b>σ<sub>y</sub></b>               | horizontal plume dispersion coefficient                                                                                                 |
| <b>σ<sub>z</sub></b>               | vertical plume dispersion coefficient                                                                                                   |

## S.1) Data collection and instrumentation

### S.1.1) Mobile measurements

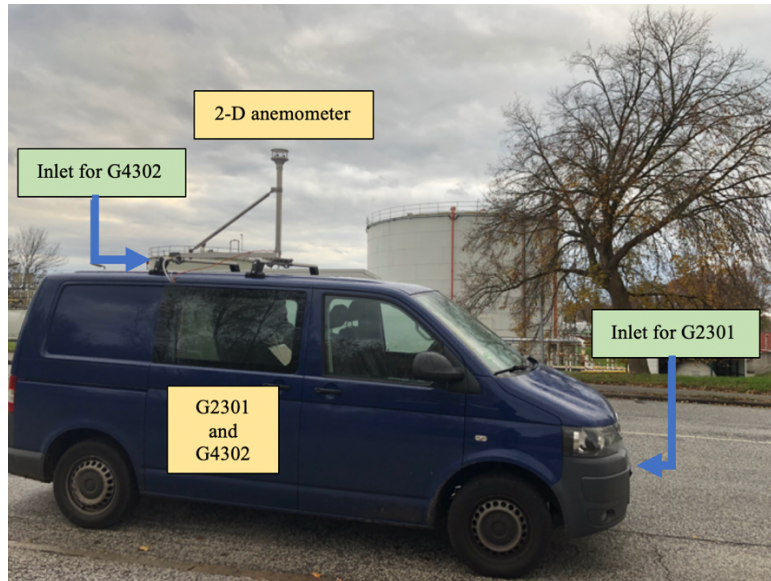

Figure S1: Mobile measurement platform

### S.1.2) Target cities

Figure S2a and Figure S2b show total length of roads driven in Utrecht ( $\approx 1,300$  km) and Hamburg ( $\approx 2,500$  km). The areas outlined in black are the city areas where LIs from the NGDN were evaluated.

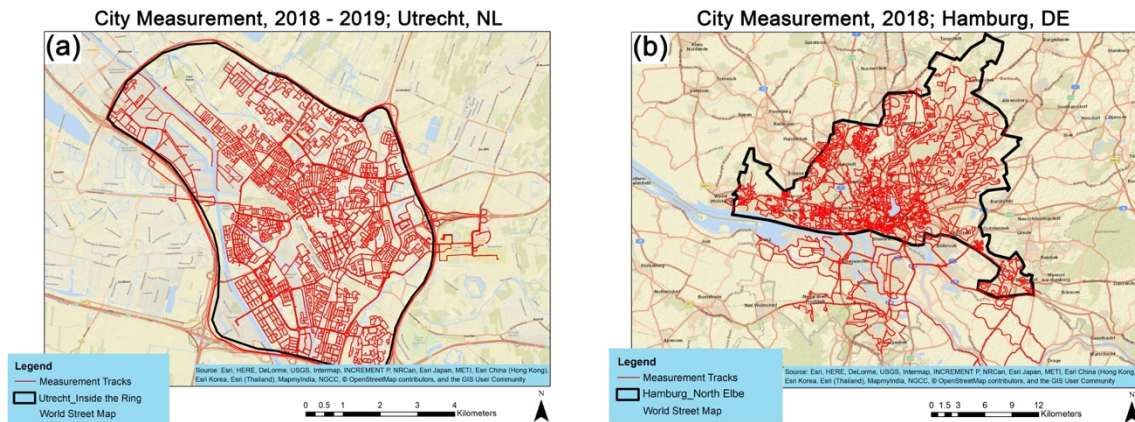

Figure S2: Mobile measurement in (a) Utrecht and (b) Hamburg

Table S1 and Table S2 provide information on each day's survey dates, districts targeted, instruments on-board, and duration of mobile measurements during each individual measurement days.

**Table S1: Information about each day's mobile measurement surveys in Utrecht**

| Date<br>dd.mm.yyyy | Picarro<br>G2301 |                 | Picarro<br>G4302 |                 | Target District                                                                                                                                                                                         | km driven | Km driven inside the ring |
|--------------------|------------------|-----------------|------------------|-----------------|---------------------------------------------------------------------------------------------------------------------------------------------------------------------------------------------------------|-----------|---------------------------|
|                    | Availability     | Time correction | Availability     | Time correction |                                                                                                                                                                                                         |           |                           |
| 20.02.2018         | Yes              | 14              | -                | -               | Kanaleneiland                                                                                                                                                                                           | 48.2      | 46.4                      |
| 25.02.2018         | Yes              | 14              | -                | -               | Oud Hoograven, Hoograven, Lunette, and Hoograven,                                                                                                                                                       | 53.2      | 50.5                      |
| 26.02.2018         | Yes              | 14              | -                | -               | Tolsteeg                                                                                                                                                                                                | 31.8      | 29.2                      |
| 27.02.2018         | Yes              | 14              | -                | -               | Rivierenwijk                                                                                                                                                                                            | 28.6      | 26.0                      |
| 01.03.2018         | Yes              | 14              | -                | -               | Lombok, Nieuw Engeland, Oog in Al, and Halve Maan                                                                                                                                                       | 72.2      | 69.8                      |
| 12.03.2018         | Yes              | 14              | -                | -               | Rubenslaan, Schildersbuurt, Rijsweerd, Tuindorp, and the Waste Water Treatment Plant                                                                                                                    | 68.7      | 64.1                      |
| 13.03.2018         | Yes              | 14              | -                | -               | Zeeheldenbuurt Hengeveldstraat, Rijsweerd Noord, Wittevrouwen, Buiten Wittevrouwen, and Oudwijk                                                                                                         | 51        | 45.8                      |
| 14.03.2018         | Yes              | 14              | -                | -               | Overvecht, Wolga- en Donaudreef, Taag- en Rubicondreef, Tigris- en Bostondreef, Schaakbuurt, and Geuzenwijk                                                                                             | 123.9     | 119.6                     |
| 15.03.2018         | Yes              | 14              | -                | -               | Lauwerecht, Pijlsweerd-Zuid, Tweede Daalsebuurt, Egelantierstraat-Mariëndaalstraat, Het Kleine Wijk, and Waste Water Treatment Plant                                                                    | 51.9      | 42.3                      |
| 23.04.2018         | Yes              | 14              | -                | -               | Zuilen-Noord, Prins Bernhardplein, and Elinkwijk,                                                                                                                                                       | 45.6      | 25.2                      |
| 24.04.2018         | Yes              | 14              | -                | -               | Elinkwijk, Schepenbuurt bedrijvengebied Cartesiusweg, Dichterswijk, City Centre (Lange Nieuwstraat, Hooch Boulandt Moreelsepark, Wijk C, Breedstraatbuurt, Nobelstraat) and Waste Water Treatment Plant | 204.4     | 117.1                     |
| 25.04.2018         | Yes              | 14              | -                | -               | Blauwkapel and Voordorp en Voorveldsepolder                                                                                                                                                             | 25.5      | 23.3                      |
| 26.04.2018         | Yes              | 14              | -                | -               | Transwijk-Noord, Bedrijvengebied Kanaleneiland, and Bedrijventerrein De Wetering                                                                                                                        | 100.5     | 94.0                      |
| 29.04.2018         | Yes              | 14              | -                | -               | Bedrijventerrein Lageweide, Bedrijvengebied Overvecht, Wijk C, Rijsweerd Noord, Waste Water Treatment Plant, and City Rings                                                                             | 36.3      | 33.9                      |
| 09.05.2018         | Yes              | 14              | -                | -               | Hoograven-Zuid, Kanaleneiland, and Waste Water Treatment Plant                                                                                                                                          | 53.3      | 39.0                      |
| 07.01.2019         | Yes              | 28              | -                | -               | Kanaleneiland and Waste Water Treatment Plant                                                                                                                                                           | 38.4      | 30.4                      |
| 14.02.2019         | Yes              | 28              | Yes              | 108             | City Centre (Lange Nieuwstraat, Hooch Boulandt Moreelsepark, Wijk C, Breedstraatbuurt, Nobelstraat)                                                                                                     | 54.7      | 52.2                      |
| 15.02.2019         | Yes              | 28              | Yes              | 108             | Kanaleneiland                                                                                                                                                                                           | 63.2      | 60.0                      |
| 24.04.2019         | Yes              | 28              | Yes              | 220             | City Centre, Kardinaal de Jongweg and Kanaleneiland                                                                                                                                                     | 39.2      | 23.1                      |
| 04.06.2019         | Yes              | 21              | Yes              | 220             | Joseph Haydnlaan, Westbroek, and Waste Water Treatment Plant                                                                                                                                            | 68.1      | 18.8                      |

**Table S2: Information about each day's mobile measurement surveys in Hamburg**

| Date<br>dd.mm.yyyy | Picarro<br>G2301 |                 | Picarro<br>G4302 |                 | Target District                                                                                  | km driven | Km driven north Elbe |
|--------------------|------------------|-----------------|------------------|-----------------|--------------------------------------------------------------------------------------------------|-----------|----------------------|
|                    | Availability     | Time correction | Availability     | Time correction |                                                                                                  |           |                      |
| 18.10.2018         | Yes              | 28              | Yes              | 212             | Harbor                                                                                           | 50.9      | 13.7                 |
| 19.10.2018         | Yes              | 28              | Yes              | 212             | Harbor and oil extraction site                                                                   | 125.39    | 18.39                |
| 20.10.2018         | Yes              | 28              | Yes              | 212             | Rotherbaum, Hoheluft-West, and Lokstedt                                                          | 76.2      | 76.2                 |
| 22.10.2018         | Yes              | 28              | Yes              | 217             | Niendorf                                                                                         | 89.3      | 89.3                 |
| 24.10.2018         | Yes              | 28              | Yes              | 218             | Schnelsen and Eidelstedt-West                                                                    | 98.8      | 91.6                 |
| 25.10.2018         | Yes              | 28              | Yes              | 218             | Harbor                                                                                           | 122.6     | 12.6                 |
| 26.10.2018         | Yes              | 28              | -                | -               | Groß Flottbek                                                                                    | 47.1      | 47.1                 |
| 27.10.2018         | Yes              | 28              | Yes              | 220             | City Centre                                                                                      | 74.2      | 72.3                 |
| 28.10.2018         | Yes              | 28              | Yes              | 220             | Altona                                                                                           | 80.9      | 80.9                 |
| 29.10.2018         | Yes              | 28              | Yes              | 220             | Othmarschen-West, Nienstedten-East                                                               | 66.8      | 66.8                 |
| 30.10.2018         | Yes              | 28              | Yes              | 220             | Blankenese, Sülldorf, and Rissen                                                                 | 137.6     | 132.4                |
| 31.10.2018         | Yes              | 28              | Yes              | 226             | St. Georg, Hamburg-Hamm, Hohenfelde, Eilbek, and Barmbek-Süd                                     | 99.5      | 99.5                 |
| 01.11.2018         | Yes              | 28              | Yes              | 227             | Rahlstedt, Wandsbek, and Billstedt                                                               | 156.5     | 154.8                |
| 02.11.2018         | Yes              | 28              | Yes              | 228             | Sasel, Bergstedt, and Bramfeld,                                                                  | 111.3     | 111.3                |
| 03.11.2018         | Yes              | 28              | Yes              | 229             | Barmbek-Süd, Winterhude, and Barmbek-Nord                                                        | 82.7      | 82.7                 |
| 04.11.2018         | Yes              | 28              | Yes              | 230             | Hamburg-Nord, Hummelsbüttel, Langenhorn, Lemsahl-Mellingstedt, Duvenstedt, and Wohldorf-Ohlstedt | 201.7     | 192.5                |
| 06.11.2018         | Yes              | 28              | Yes              | 236             | Eimsbüttel, Lokstedt, Winterhude-North, Rotherbaum-West, and Schnelsen                           | 114.6     | 114.6                |
| 07.11.2018         | Yes              | 28              | Yes              | 236             | Harbor and Sampling                                                                              | 93.2      | 12.2                 |
| 08.11.2018         | Yes              | 28              | Yes              | 236             | Sampling                                                                                         | 81.7      | 76.4                 |
| 09.11.2018         | Yes              | 28              | Yes              | 236             | Sampling                                                                                         | 122.9     | 43.5                 |
| 10.11.2018         | Yes              | 28              | Yes              | 236             | Lurup, Groß Flottbek – NorthWest, Marmstorf, Neugraben-Fischbek, Harburg, and Ronneburg          | 171.6     | 78.7                 |
| 11.11.2018         | Yes              | 28              | Yes              | 240             | Bergedorf, Allermöhe, Lohbrügge,                                                                 | 175.1     | 88.5                 |
| 14.11.2018         | Yes              | 28              | Yes              | 245             | East-West Transects on the North Side of the Elbe River                                          | 87.4      | 72.6                 |

### S.1.3) Instruments comparison

In the Hamburg study, the two analyzers (G2301 and G4302) were operated in parallel. The Picarro G2301 instrument measures methane ( $\text{CH}_4$ ), carbon dioxide ( $\text{CO}_2$ ), and water vapor ( $\text{H}_2\text{O}$ ) and provides 0.3 Hz measurements at a flow rate of about  $200 \text{ ml min}^{-1}$  and the G4302 measures  $\text{CH}_4$ , ethane ( $\text{C}_2\text{H}_6$ ), and  $\text{H}_2\text{O}$  with a frequency of 1 Hz and at a flow rate of about  $2 \text{ L min}^{-1}$ . The G4302 can be operated in  $\text{CH}_4$  only mode, or in  $\text{C}_2\text{H}_6 - \text{CH}_4$  mode, where the noise of  $\text{CH}_4$  measurements increases by about one order of magnitude. The inlet for the Picarro G2301 instrument was from the bumper while the inlet for the G4302 was from the roof of the vehicle (Figure S1). In Figure S3c and Figure S3d linear correlation of methane mole fractions shows a correlation of results from the G2301 and G4302 instruments, the latter in both  $\text{C}_2\text{H}_6$  and  $\text{CH}_4$ -only mode, which show good linear correlation in both modes. In order to guarantee consistency with the von Fischer et al., (2017) and Weller et al., (2019) quantification algorithm which was developed for a G2301 instrument, in our study the data from this instrument are used for the  $\text{CH}_4$  quantification and attribution through  $\text{CH}_4:\text{CO}_2$  ratio, and the G4302 is primarily used for source attribution via the  $\text{C}_2\text{H}_6:\text{CH}_4$  ratio ( $\text{C}_2:\text{C}_1$ ).

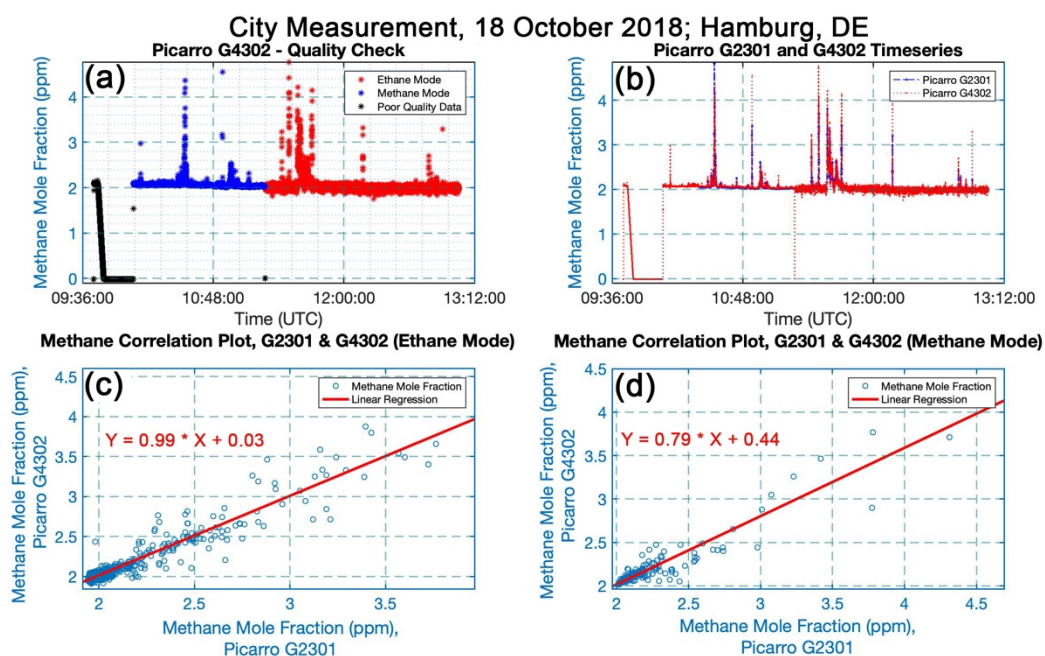

**Figure S3: (a) Example of raw data and data quality check of G4302, (b) timeseries of  $\text{CH}_4$  mole fraction recorded by G2301 and G4302, (c) in-situ measurement correlation plot of G2301 and G4302 while the G4302 was in ethane mode, and (d) in-situ measurement correlation plot of G2301 and G4302 while the G4302 was in methane mode**

Table S3 shows a comparison between the different instruments and inlets for a selection of  $\text{CH}_4$  enhancements where the G4302 operated in  $\text{CH}_4$  mode.  $\text{CH}_4$  enhancements above background level are referred to leak indications (LIs). All the LIs were observed by both instruments when both instruments were running together. In a few cases, the G4302 places an LI in a higher category (when using the Weller et al., (2019) algorithm). The largest difference between the two instruments was observed for the highest LI in Utrecht, where a  $\text{CH}_4$  enhancement of 16.2 ppm (corresponding to  $100 \text{ L min}^{-1}$ ) was recorded on the G2301 instrument, whereas an enhancement of 31.9 ppm (corresponding to  $230 \text{ L min}^{-1}$ ) was recorded by the G4302. The difference may be due to the higher flow rate and sampling rate of the G4302, which reduces smoothing in the sample cell compared to the G2301 instrument. However, the difference may also be due to the two different inlets sampling different parts of the plume, because of the different inlet location. In principle, the expected behavior would then be opposite: Larger enhancements would be expected closer to the ground where the inlet of the G2301 instrument

is located, but turbulent plume dispersion in on streets by driving cars can result in very irregularly shaped emission plumes.

**Table S3: Comparison of enhancements detected with the G2301 and G4302 instruments**

| Instrument | Yellow category<br>(0.5 – 6 L min <sup>-1</sup> emissions) | Orange category<br>(6 – 40 L min <sup>-1</sup> emissions) | Red Category<br>(>40 L min <sup>-1</sup> emissions) | Total | Sum Emissions (L min <sup>-1</sup> ) |
|------------|------------------------------------------------------------|-----------------------------------------------------------|-----------------------------------------------------|-------|--------------------------------------|
| Hamburg    |                                                            |                                                           |                                                     |       |                                      |
| G2301      | 90                                                         | 8                                                         | 2                                                   | 100   | 370                                  |
| G4302      | 86                                                         | 12                                                        | 2                                                   | 100   | 400                                  |
| Utrecht    |                                                            |                                                           |                                                     |       |                                      |
| G2301      | 22                                                         | 3                                                         | 1                                                   | 26    | 180                                  |
| G4302      | 20                                                         | 5                                                         | 1                                                   | 26    | 370*                                 |

\* The large difference is primarily due to the much higher CH<sub>4</sub> elevation recorded with the G4302 for the LI in the “red” category, see text.

#### S.1.4) Road data from Open Street Map (OSM)

Information from the Open Street Map (OSM) (Figure 1) was used for several purposes. Firstly, it was investigated whether there is any correlation between type of roads and CH<sub>4</sub> enhancements. Therefore, the streets in both cities were categorized into level 1, 2, 3, residential, and unclassified streets based on the categories from the OSM (Table S4). Secondly, not all streets across the cities were covered and data on the total road network from OSM were used to extrapolate the results from the roads covered to the entire natural gas distribution network in the cities. The OSM was also used to determine from the recorded GPS coordinates how many times each street was surveyed. As GPS coordinates may not perfectly sit on OSM data, 15m both-sided buffer zone was used for level 1, 2, and 3 and 10m both-sided buffer zone was used to extract driven streets out of OSM data. These distances are slightly smaller than used for the US cities, reflecting the denser infrastructure and street network in Utrecht and Hamburg.

#### S.1.5) Road visits

**Table S4: Road category visits**

| Inside the ring, Utrecht |            |           |                     | North Elbe, Hamburg |           |                     |
|--------------------------|------------|-----------|---------------------|---------------------|-----------|---------------------|
| Road class               | Total (km) | Once (km) | More than Once (km) | Total (km)          | Once (km) | More than Once (km) |
| Level 1                  | 37.4       | 9.0       | 28.4                | 160.5               | 92.5      | 68.0                |
| Level 2                  | 45.4       | 12.0      | 33.4                | 197.8               | 124.2     | 73.6                |
| Level 3                  | 43.5       | 14.8      | 28.7                | 194.3               | 142.5     | 51.8                |
| Residential              | 246.8      | 146.8     | 100.0               | 619.6               | 509.6     | 110.0               |
| Unclassified             | 81.7       | 48.7      | 33.0                | 50.5                | 35.7      | 14.8                |

#### S.1.6) Measurements from facilities

**Table S5: Measurement from the waste water treatment plant in Utrecht (52.109791° N, 5.107605° E)**

| No. | Date (dd.mm.yyyy) | Wind Direction (°) | Wind Speed (m s <sup>-1</sup> ) |
|-----|-------------------|--------------------|---------------------------------|
| 1   | 12.03.2018        | 200 ± 5            | 3.7 ± 1.1                       |
| 2   | 24.04.2018        | 210 ± 5            | 4.0 ± 1.2                       |
| 3   | 07.01.2019        | 178 ± 5            | 3.5 ± 1.1                       |

**Table S6: CH<sub>4</sub> measurements from facilities in Hamburg**

| Facility         | Date<br>dd.mm.yyyy | Lat (° N) | Lon (° E) | Time Start<br>(UTC)<br>hh:mm:ss | Time End<br>(UTC)<br>hh:mm:ss | Wind Direction<br>(°) | Wind<br>Speed (m<br>s <sup>-1</sup> ) |
|------------------|--------------------|-----------|-----------|---------------------------------|-------------------------------|-----------------------|---------------------------------------|
| A) Tank Reserves | 18.10.2018         | 53.493237 | 9.969307  | 11:25:43                        | 12:10:46                      | 342 ± 9.5             | 3.2 ± 1.0                             |
| B) Refinery      | 18.10.2018         | Unknown   | Unknown   | 11:00:01                        | 11:11:48                      | 328 ± 4.3             | 3.2 ± 1.0                             |
| B) Refinery      | 20.10.2018         | Unknown   | Unknown   | 13:47:00                        | 13:49:21                      | 289.8 ± 3.3           | 4.7 ± 1.4                             |
| C) Steel factory | 25.10.2018         | 53.519042 | 9.906555  | 12:42:54                        | 13:15:54                      | 288.7 ± 3.3           | 7.0 ± 2.1                             |
| C) Steel factory | 07.11.2018         | 53.519042 | 9.906555  | 11:44:46                        | 12:31:04                      | 153.7 ± 9.8           | 1.4 ± 0.4                             |
| C) Steel factory | 09.11.2018         | 53.519042 | 9.906555  | 09:59:41                        | 10:22:23                      | 109.5 ± 6.4           | 1.8 ± 0.5                             |
| D1) Separator    | 19.10.2018         | 53.468829 | 10.184400 | 08:42:11                        | 08:42:36                      | 323.5 ± 25.4          | 1.0 ± 0.3                             |
| D2) Storage Tank | 19.10.2018         | 53.468446 | 10.187410 | 08:41:44                        | 10:04:36                      | 323.5 ± 25.4          | 1.0 ± 0.3                             |



|                              |            |           |           |          |          |              |           |
|------------------------------|------------|-----------|-----------|----------|----------|--------------|-----------|
| D3) Extraction Well          | 19.10.2018 | 53.466709 | 10.180733 | 08:41:44 | 10:04:36 | 323.5 ± 25.4 | 1.0 ± 0.3 |
| D2) Storage Tank             | 11.11.2018 | 53.468446 | 10.187410 | 14:02:53 | 14:28:08 | 175 ± 1.4    | 2.7 ± 0.8 |
| E) Farm                      | 11.11.2018 | 53.444276 | 10.226374 | 14:34:30 | 15:07:49 | 174 ± 1.6    | 2.5 ± 0.8 |
| F) Compost and Soil Company  | 04.11.2018 | 53.680233 | 10.053751 | 14:44:34 | 15:29:26 | 112 ± 3.1    | 1.5 ± 0.5 |
| G) Landfill                  | 04.11.2018 | 53.690721 | 10.092599 | 09:42:58 | 10:00:52 | 124 ± 3.2    | 2.4 ± 0.7 |
| H) Car manufacturing factory | 07.11.2018 | 53.475618 | 9.925336  | 14:28:41 | 14:40:29 | 171.5 ± 3.8  | 0.8 ± 0.2 |

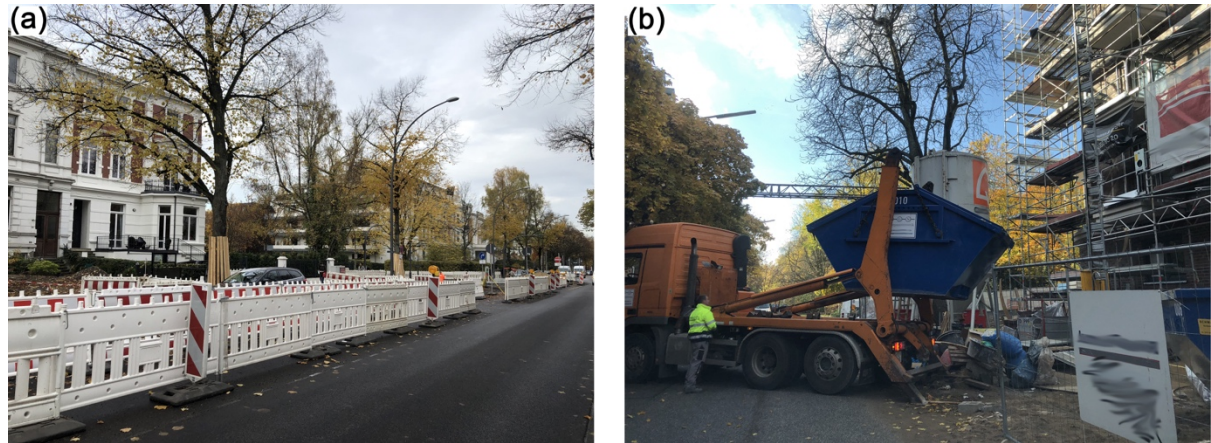

Figure S4: Construction at the street level; (a) not possible to access the total width or (b) streets were completely blocked

### S.1.7) Revisits; example of Utrecht city centre

In Figure S5, one of the revisit surveys across Utrecht is shown in which the city centre was revisited after about 10 months.

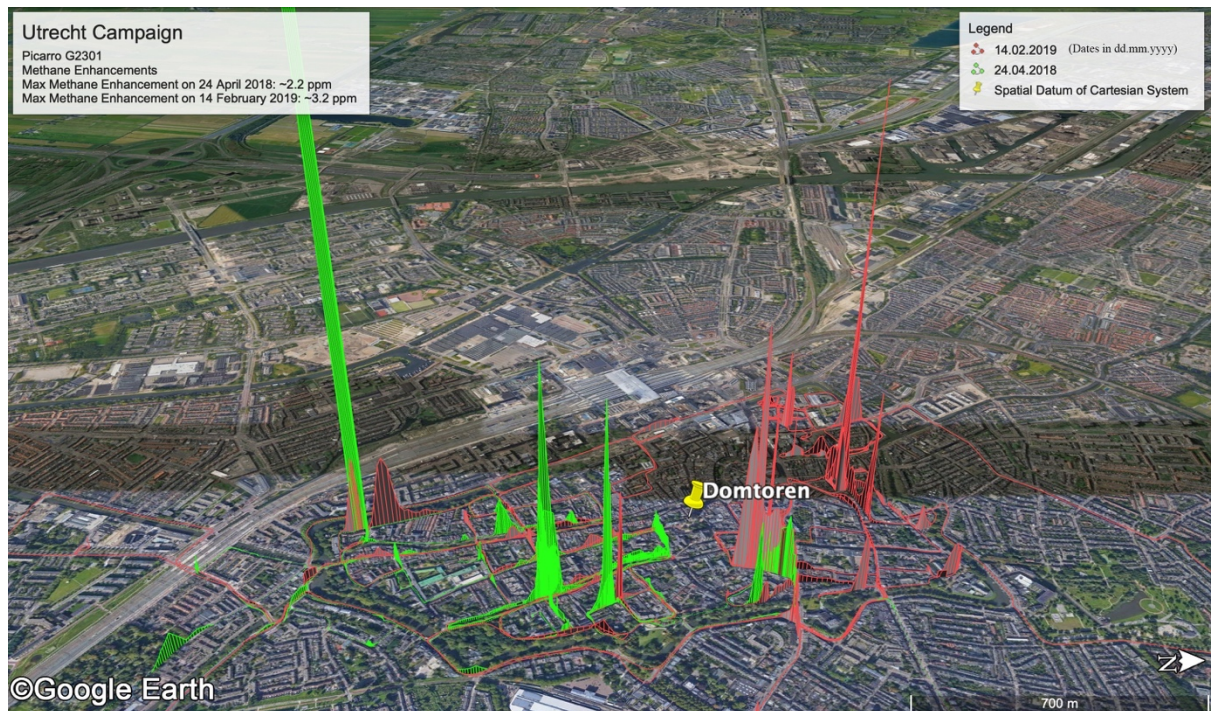

Figure S5: Mobile measurement across city centre of Utrecht in February 2018 (red) and April 2019 (green)

### S.1.8) Air sample collection

Samples were taken either inside the car or outside depending on road accessibility. Sampling locations were selected guided by the LIs observed during the untargeted surveys (Table S1 and Table S2). As the delay time of G4302 reading was lower and the analyzer is portable, it was more practical to use this instrument for sampling. In Figure S6a, M. M. is taking samples at a location where the car could stop at the LI locations. In Figure S6b, J. M. F. is walking with the G4302 analyzer to locate a source, in this case the source is shown in Figure S15.

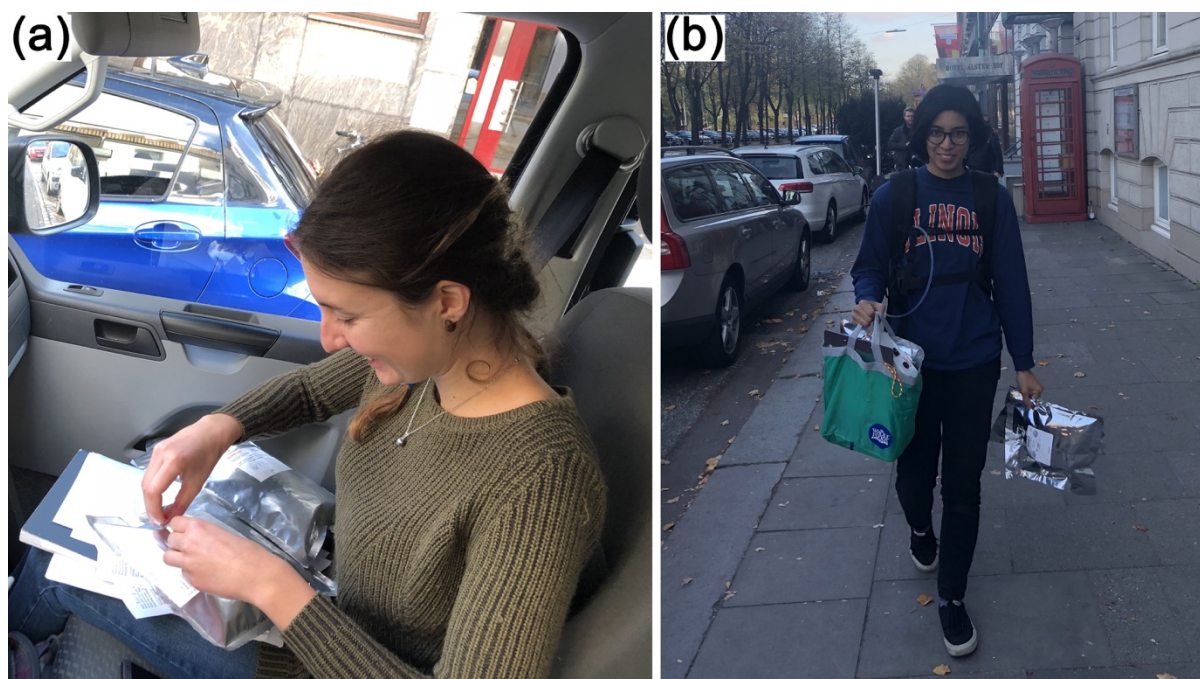

Figure S6: Taking samples (a) inside the car or (a) outside



## S.2) Data evaluation procedures of CH<sub>4</sub> quantification

### S.2.1) Background extraction

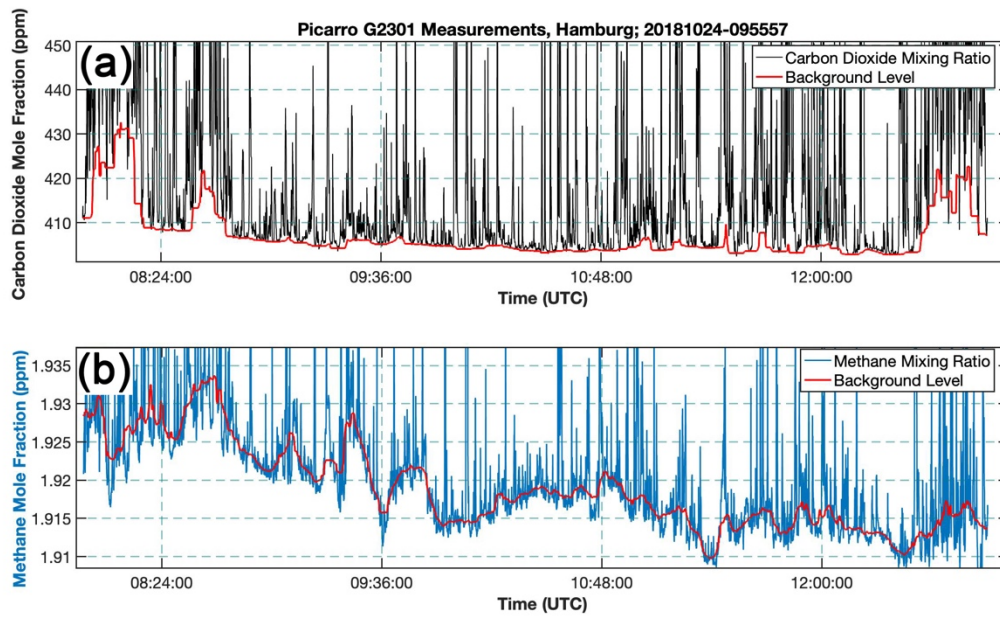

Figure S7: Background extraction of (a) CO<sub>2</sub> and (b) CH<sub>4</sub>; example of a survey in Hamburg

### S.2.2) Quantification of emissions from leak indications

The evaluation procedure was established by von Fischer et al. (2017) and Weller et al., (2019) for the G2301 instrument, so we used the dataset from G2301 for standard evaluation of LIs. Figure S8 shows the overview of CH<sub>4</sub> emission quantification steps for emissions from the natural gas distribution network.

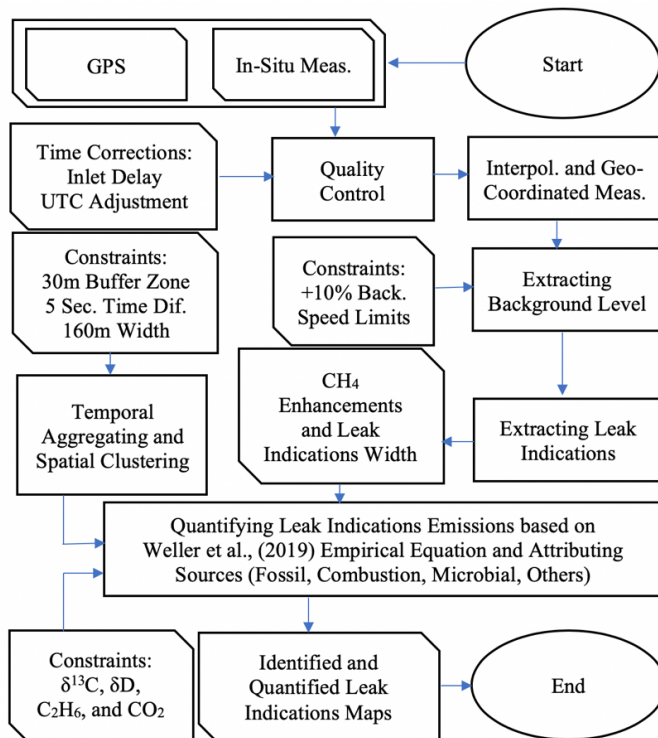

Figure S8: Flow diagrams for the evaluating CH<sub>4</sub> emissions of leak indications

### S.2.3) Cartesian system and clustering

GPS records logged in decimal degrees were converted to a Cartesian coordinate system for further LI clustering using Eq. (S1). For this, local geographical datums were defined in both cities, in Utrecht it was the city cathedral (Domtoren) and in Hamburg the St. Nicholas' Church (Table S7). The location of a point  $i$  relative to the reference point was calculated as:

$$X(i) = (\text{Longitude}(i) - \text{Longitude}(\text{Ref})) * \frac{\pi}{180} * \cos\left(\frac{\text{Latitude}(\text{Ref}) * \pi}{180}\right) * R_e \quad (\text{S1a})$$

$$Y(i) = (\text{Latitude}(i) - \text{Latitude}(\text{Ref})) * \frac{\pi}{180} * R_e \quad (\text{S1b})$$

where  $R_e = 6.378 \times 10^6$  m is the radius of the Earth.

**Table S7: Local geographical datums in Utrecht and Hamburg**

| City    | Location             | Latitude (° N) | Longitude (° E) |
|---------|----------------------|----------------|-----------------|
| Utrecht | Domtoren             | 52.090628      | 5.121310        |
| Hamburg | St. Nicholas' Church | 53.547479      | 9.990709        |

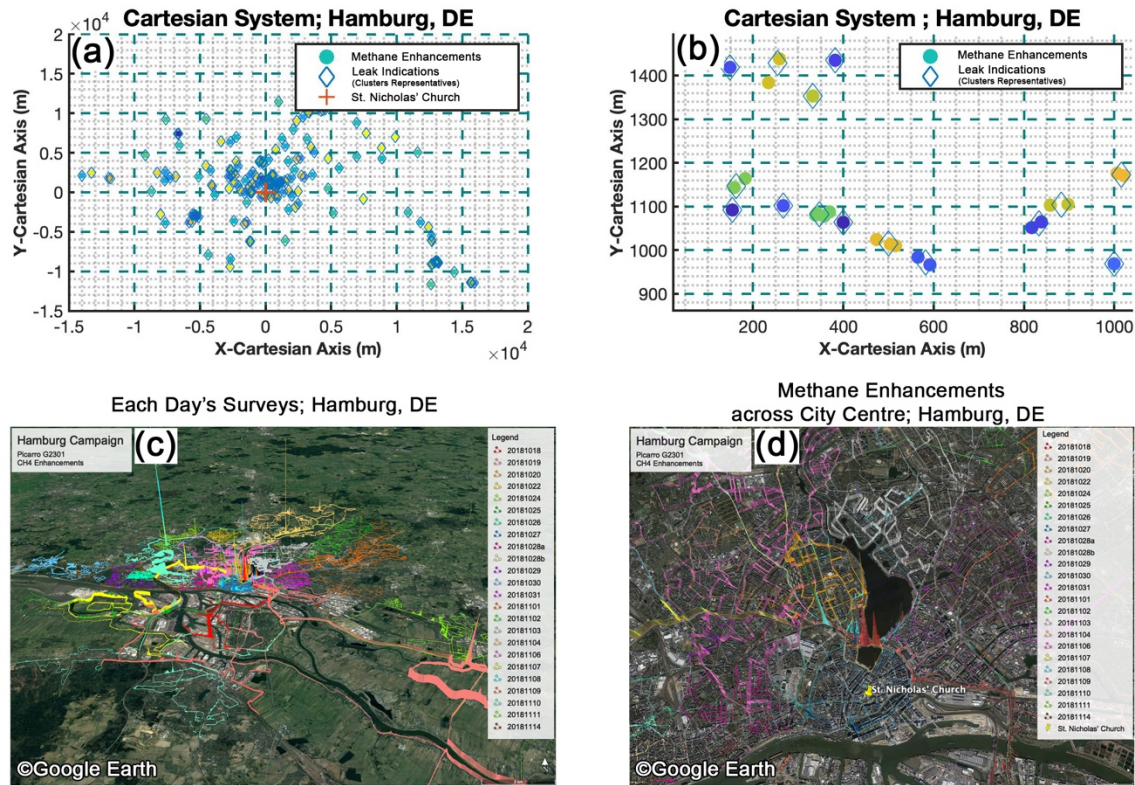

**Figure S9: Emission locations and clusters. (a) All LIs and clusters in the target area, (b) LIs and clusters in a smaller region, (c) complete view of each day's surveys across Hamburg, and (d) focus of each day's surveys across city centre of Hamburg**

### S.2.4) Code comparison with CSU

Figure S10 shows a comparison of results obtained with the MATLAB code from Utrecht University (UU) (Maazallahi et al., 2020) with the code that was used by Colorado State University (CSU) for US cities. The two evaluation systems return basically very similar results.

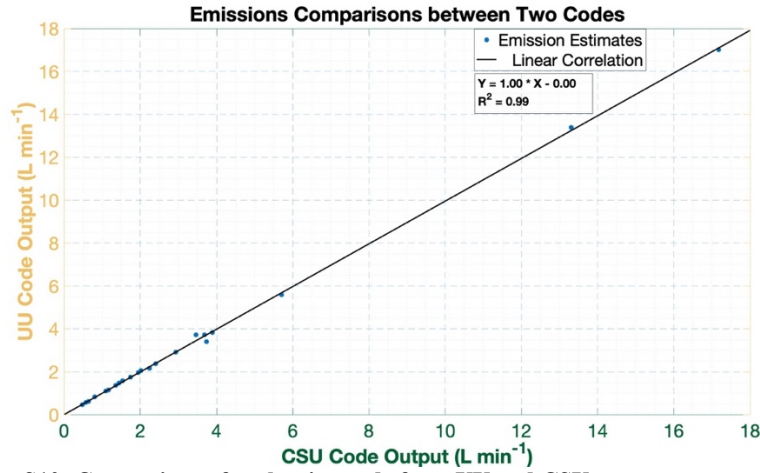

Figure S10: Comparison of evaluation code from UU and CSU

We adopt the distribution of observed CH<sub>4</sub> enhancements into different LI categories according to von Fischer et al., (2017).

### S.2.5) Quantification of emissions from facilities

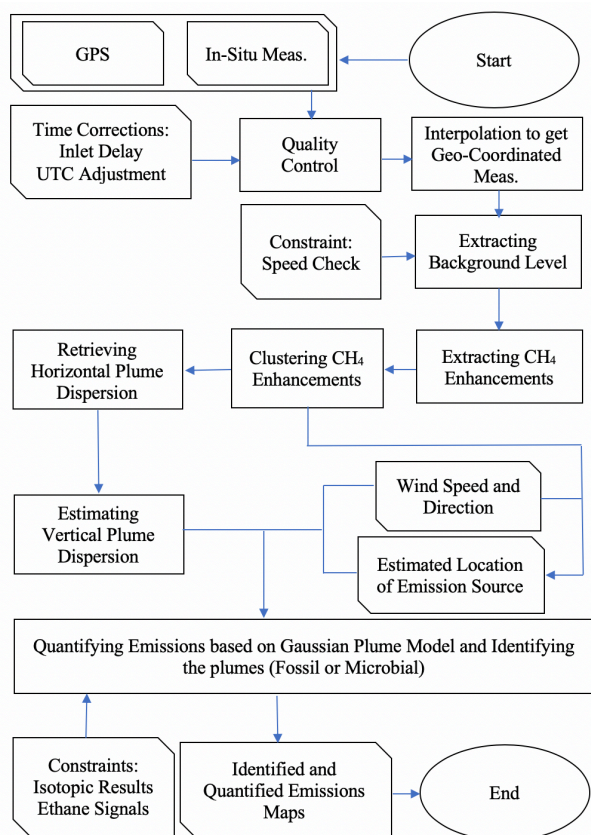

Figure S11: Flow diagrams for the evaluating CH<sub>4</sub> emissions of facilities



There are considerable difficulties and uncertainties in quantifying CH<sub>4</sub> emissions from facilities. Finding suitable roads that allow application of the Gaussian Plume Dispersion Model (GPDM) technique downwind of the source is often challenging. In addition, the characteristics of the sources are often complex. Waste water treatment plants like the one in Utrecht consist of several water tanks, but in the GPDM the whole plant was considered as one-point source. The same applies to the Compost and Soil Company and water-oil separator in Hamburg. Changing the distance from the source along the x-axis in GPDM analysis results in changes in  $\sigma_z$ , and for the case shown in Figure 7  $\sigma_z = 32.1 \pm 14.2$  m. Errors in wind speed are estimated to be  $\pm 30\%$  and for wind direction  $\pm 5^\circ$ . These errors are included in the total error estimate. The uncertainty in the height of the CH<sub>4</sub> emission is most relevant for the case of the storage tank in Hamburg. Most likely, emissions are from the top of tanks, but there can also be emissions at ground level. In addition, vertically stable atmospheric conditions or larger turbulences may lead to transport of air from a higher emission point to the ground level. In the simple GPDM, emission estimates rise exponentially when the point of emission is elevated. E.g. by changing source emission height from 0 - 10 m for the storage tank in Hamburg, the emission rate would change from 3.4 to 10.6 t yr<sup>-1</sup>.

Emissions from facilities show significant contributions to the total emissions in both cities. This highlights the importance of considering emissions from all possible sources within a boundary of an study area. Hopkins et al. (2016) showed that more than 30 % of emissions from Los Angeles basin were not accounted in the emission inventory which are due to widely spread sources and mostly originate from fugitive fossil fuel emissions.

### S.2.6) Unintended measurements

Figure S12 shows measurements during a period when the measurement vehicle followed a car exhausting black smoke. Black smoke is an indication for incomplete internal combustion of the vehicle. In Figure S12, the ratio of the area under the CH<sub>4</sub> enhancements along the driving track (in ppb\*m) to the area of CO<sub>2</sub> enhancements along the driving track (in ppm\*m) is 5.5 ppb:ppm which is much higher than reported in previous studies, possibly indicating incomplete combustion.

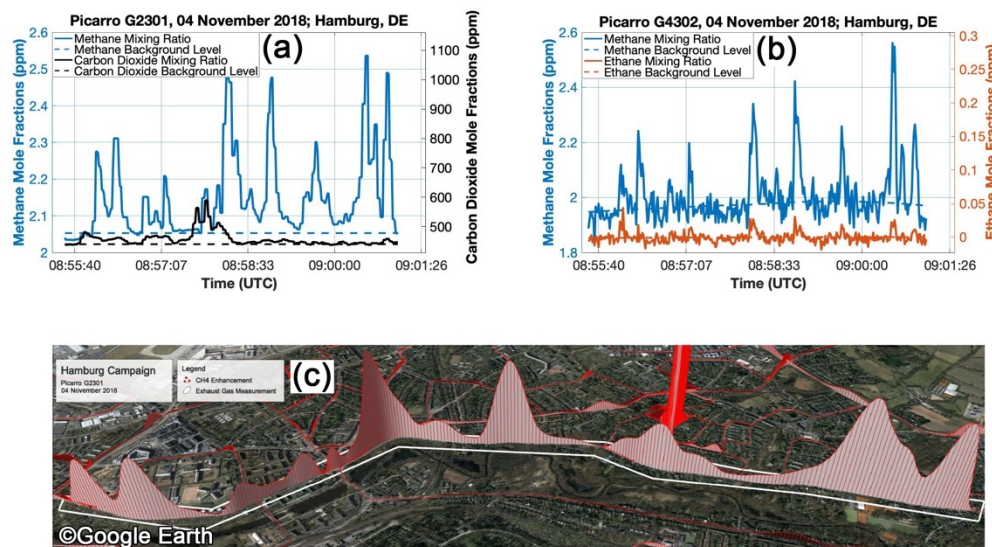

Figure S12: Exhaust measurement from a car; (a) timeseries of CH<sub>4</sub> and CO<sub>2</sub> mole fractions from G2301, (b) timeseries of CH<sub>4</sub> and C<sub>2</sub>H<sub>6</sub> mole fractions from G4302, and (c) the CH<sub>4</sub> excess track of measurement while following the car

### S.2.7) Data evaluation procedures of isotopic analysis

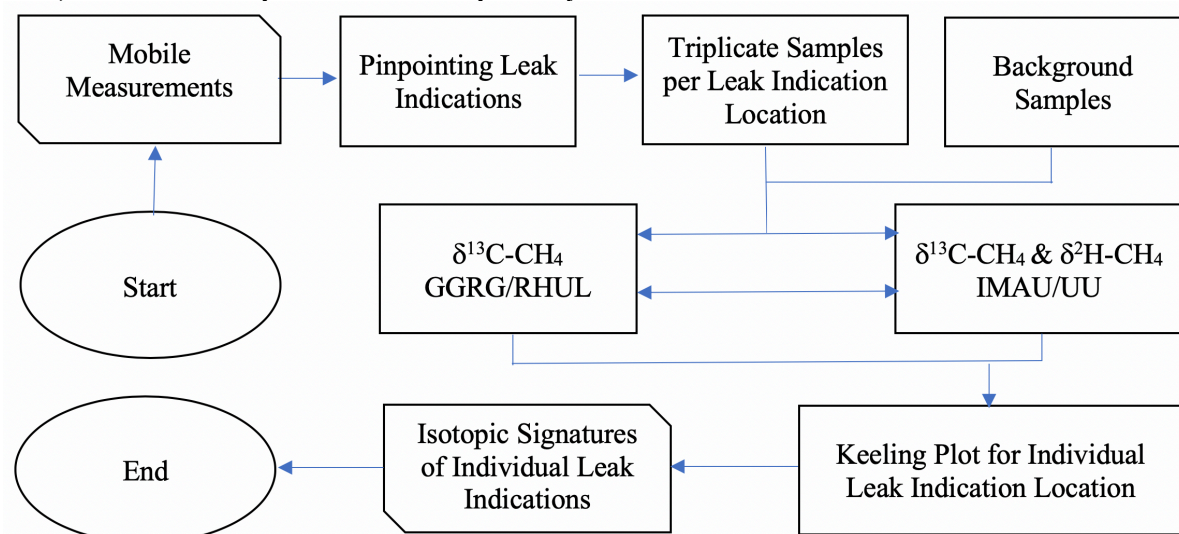

Figure S13: Flow diagram for isotope analysis

### S.3) Evaluations outcomes

#### S.3.1) Methane emission distribution over different road categories

**Table S8: Statistics of observed LIs for different street categories in Hamburg and Utrecht. The three values per cell are the number of LIs, the total emission rate from all LIs in this category and the emission rate per LI**

|                           |                  | Total                                    | Visited once                             | Visited more than once                   |
|---------------------------|------------------|------------------------------------------|------------------------------------------|------------------------------------------|
| <b>Level 1</b>            |                  |                                          |                                          |                                          |
| Utrecht (Inside the Ring) | Number           | 6 LIs                                    | ----                                     | 6 LIs                                    |
|                           | Emissions        | 4.6 L min <sup>-1</sup>                  | ----                                     | 4.6 L min <sup>-1</sup>                  |
|                           | Emissions per LI | 0.76 L/min/LI                            | ----                                     | 0.76 L/min/LI                            |
| Hamburg (North Elbe)      | Number           | 29 LIs                                   | 10 LIs                                   | 19 LIs                                   |
|                           | Emissions        | 68.1 L min <sup>-1</sup>                 | 15.5 L min <sup>-1</sup>                 | 52.7 L min <sup>-1</sup>                 |
|                           | Emissions per LI | 2.3 L/min/LI                             | 1.5 L/min/LI                             | 2.8 L/min/LI                             |
| <b>Level 2</b>            |                  |                                          |                                          |                                          |
| Utrecht (Inside the Ring) | Number           | 16 LIs                                   | 2 LIs                                    | 14 LIs                                   |
|                           | Emissions        | 144.7 L min <sup>-1</sup>                | 6.4 L min <sup>-1</sup>                  | 138.3 L min <sup>-1</sup>                |
|                           | Emissions per LI | 9.0 L/min/LI                             | 3.2 L/min/LI                             | 9.9 L/min/LI                             |
| Hamburg (North Elbe)      | Number           | 34 LIs                                   | 2 LIs                                    | 32 LIs                                   |
|                           | Emissions        | 99.4 L min <sup>-1</sup>                 | 1.5 L/min                                | 97.94 L min <sup>-1</sup>                |
|                           | Emissions per LI | 2.9 L/min/LI                             | 0.7 L/min/LI                             | 3.1 L/min/LI                             |
| <b>Level 3</b>            |                  |                                          |                                          |                                          |
| Utrecht (Inside the Ring) | Number           | 3 LIs                                    | 1 LI                                     | 2 LIs                                    |
|                           | Emissions        | 10.2 L min <sup>-1</sup>                 | 1.6 L min <sup>-1</sup>                  | 8.6 L min <sup>-1</sup>                  |
|                           | Emissions per LI | 3.4 L min <sup>-1</sup> LI <sup>-1</sup> | 1.6 L min <sup>-1</sup> LI <sup>-1</sup> | 4.3 L min <sup>-1</sup> LI <sup>-1</sup> |
| Hamburg (North Elbe)      | Number           | 23 LIs                                   | 8 LIs                                    | 15 LIs                                   |
|                           | Emissions        | 43.0 L min <sup>-1</sup>                 | 7.6 L min <sup>-1</sup>                  | 35.4 L min <sup>-1</sup>                 |
|                           | Emissions per LI | 1.9 L min <sup>-1</sup> LI <sup>-1</sup> | 1.0 L min <sup>-1</sup> LI <sup>-1</sup> | 2.4 L min <sup>-1</sup> LI <sup>-1</sup> |
| <b>Residential</b>        |                  |                                          |                                          |                                          |
| Utrecht (Inside the Ring) | Number           | 45 LIs                                   | 8 LIs                                    | 37 LIs                                   |
|                           | Emissions        | 92.7 L min <sup>-1</sup>                 | 12.6 L min <sup>-1</sup>                 | 80.1 L min <sup>-1</sup>                 |
|                           | Emissions per LI | 2.1 L min <sup>-1</sup> LI <sup>-1</sup> | 1.6 L min <sup>-1</sup> LI <sup>-1</sup> | 2.2 L min <sup>-1</sup> LI <sup>-1</sup> |
|                           | Number           | 52 LIs                                   | 23 LIs                                   | 29 LIs                                   |
|                           | Emissions        | 273.8 L min <sup>-1</sup>                | 41.8 L min <sup>-1</sup>                 | 232.1 L min <sup>-1</sup>                |
|                           | Emissions per LI | 5.3 L min <sup>-1</sup> LI <sup>-1</sup> | 1.8 L min <sup>-1</sup> LI <sup>-1</sup> | 8.0 L min <sup>-1</sup> LI <sup>-1</sup> |
| <b>Unclassified</b>       |                  |                                          |                                          |                                          |
| Utrecht (Inside the Ring) | Number           | 11 LIs                                   | 5 LIs                                    | 6 LIs                                    |
|                           | Emissions        | 37.8 L min <sup>-1</sup>                 | 13.4 L min <sup>-1</sup>                 | 24.4 L min <sup>-1</sup>                 |
|                           | Emissions per LI | 3.4 L min <sup>-1</sup> LI <sup>-1</sup> | 2.7 L min <sup>-1</sup> LI <sup>-1</sup> | 4.1 L min <sup>-1</sup> LI <sup>-1</sup> |
| Hamburg (North Elbe)      | Number           | 7 LIs                                    | 2 LIs                                    | 5 LIs                                    |
|                           | Emissions        | 5.9 L min <sup>-1</sup>                  | 1.5 L min <sup>-1</sup>                  | 4.4 L min <sup>-1</sup>                  |
|                           | Emissions per LI | 0.8 L min <sup>-1</sup> LI <sup>-1</sup> | 0.8 L min <sup>-1</sup> LI <sup>-1</sup> | 0.9 L min <sup>-1</sup> LI <sup>-1</sup> |

### S.3.2) Emission per capita

Per-capita emissions in both cities were based on the LandScan data, which use remote sensing imagery and analysis of nighttime lights, land cover and road proximity at  $\approx 1 \text{ km}^2$  ( $30'' * 30''$ ) spatial resolution (Bright et al., 2000) to estimate population density. The LandScan data yield 0.28 and 1.45 million inhabitants in the study area of Utrecht and Hamburg respectively (Figure S14).

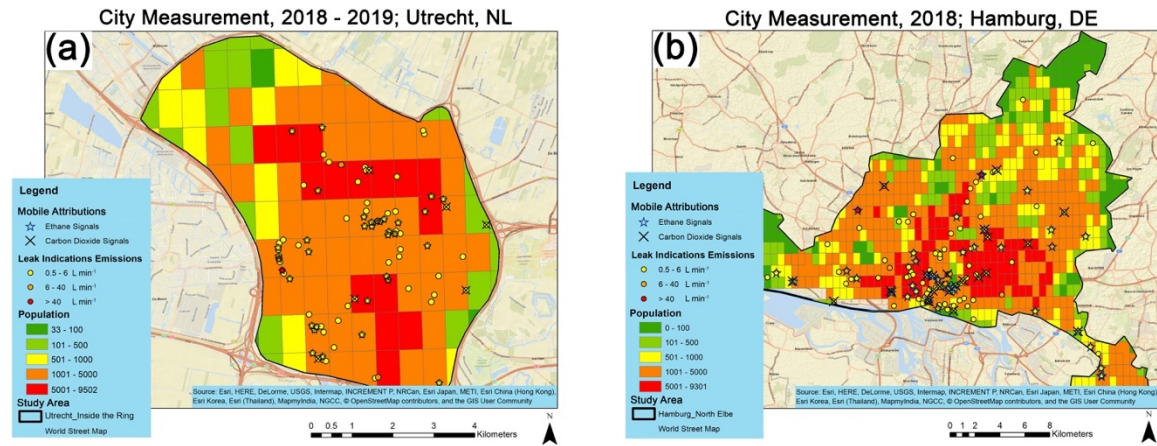

Figure S14: Population distribution in (a) Utrecht and (b) Hamburg



### S.3.3) Isotopic signature and ethane/methane ratio

**Table S9: Isotopic signature and ethane/methane ( $C_2:C_1$ ) ratio; North Elbe area in Hamburg**

| No. | Latitude (° N) | Longitude (° E) | Location                    | $\delta^{13}C$ | $\delta D$ | $C_2:C_1$ (%) | Emission (L min <sup>-1</sup> ) |
|-----|----------------|-----------------|-----------------------------|----------------|------------|---------------|---------------------------------|
| 1   | 53.5605556     | 9.99483722      | Warburgstrasse              | -50.4          | -278.5     | 0             | 7.6                             |
| 2   | 53.577521      | 9.988869        | Rothenbaumchaussee          | -62.7          | -258       | 0             | 1.9                             |
| 3   | 53.567191      | 9.999819        | Alte Rabenstrasse           | -52.19         | -317.9     | 0             | 7.5                             |
| 4   | 53.557113      | 9.996773        | Lombardsbrücke              | -46.3          | -344.6     | 0             | 11.4                            |
| 5   | 53.548297      | 9.973536        | Neumayerstrasse             | -49.9          | -315.6     | 0             | 15.0                            |
| 6   | 53.558212      | 10.006785       | An der Alster               | -23.4          | -152.5     | 0             | 1.8                             |
| 7   | 53.582506      | 10.016915       | Geibelstrasse               | -40.7          | -194.2     | $3.0 \pm 1.0$ | 1.6                             |
| 8   | 53.63921       | 10.040574       | Distelweg                   | -42.6          | -206.8     | $1.5 \pm 0.5$ | 46.6                            |
| 9   | 53.614763      | 9.892181        | Halstenbekerweg             | -43.3          | -187       | $3.6 \pm 1.5$ | 1.7                             |
| 10  | 53.61402       | 9.890026        | Astweg                      | -41.9          | -185.1     | $3.6 \pm 1.5$ | 98.1                            |
| 11  | 53.5631395     | 9.9862702       | Edmund-Siemers Allee        | -41.2          | -207.4     | $3.8 \pm 0.7$ | 19.5                            |
| 12  | 53.5836695     | 9.9839906       | Eppendorfer Baum            | -51.1          | -301.3     | 0             | 2.0                             |
| 13  | 53.5431789     | 10.0255373      | Amsinckstrasse+Süderstrasse | -53.6          | -272.7     | 0             | 1.6                             |

**Table S10: Isotopic signature and  $C_2:C_1$  ratio from facilities in Hamburg**

| No. | Date<br>dd.mm.yyyy | Latitude (° N) | Longitude (° E) | Location                                            | Wind Direction   | $\delta^{13}C$ | $\delta D$ | $C_2:C_1$     |
|-----|--------------------|----------------|-----------------|-----------------------------------------------------|------------------|----------------|------------|---------------|
| 1   | 04.11.2018         | 53.68281       | 10.046241       | Hummelsbütteler Steindamm (F)                       | $112 \pm 3.1$    | -46.9          | -265.4     | 0             |
| 2   | 10.11.2018         | 53.572974      | 9.898723        | Luruper Chaussee; Sudden wide plume                 | $155.9 \pm 10.1$ | -62.6          | -287.8     | 0             |
| 3   | 09.11.2018         | 53.541798      | 9.917605        | The New Elbe Tunnel                                 | $111.7 \pm 6.3$  | -28.6          | -176.2     | ---           |
| 4   | 09.11.2018         | 53.51684       | 9.91380075      | Steel factory;<br>Dradenuastrasse (C)               | $109.5 \pm 6.4$  | -50.1          | -228.2     | $4.6 \pm 1.9$ |
|     | 09.11.2018         | 53.5214485     | 9.90923915      | Steel factory;<br>Dradenuastrasse (C)               | $109.5 \pm 6.4$  | -49.5          | -269.9     | ---           |
| 5   | 18.10.2018         | 53.49147       | 9.97216         | Oil storage tanks (A)                               | $342 \pm 9.5$    | -48.3          | -421.7     | 0             |
| 6   | 07.11.2018         | 53.47645       | 9.924026        | Mercedesstraße (H)                                  | $171.5 \pm 3.8$  | -43.0          | -207.3     | $2.4 \pm 0.6$ |
| 7   | 19.10.2018         | 53.40675       | 10.13535        | Big Plume;<br>Steller Chaussee                      | $290 \pm 29.5$   | -66.0          | -101.9     | ---           |
| 8   | 11.11.2018         | 53.445221      | 10.228102       | Farm;<br>Neuengammer Hausdeich                      | $174 \pm 1.6$    | -57.0          | -317.2     | 0             |
| 9   | 19.10.2018         | 53.46275       | 10.18198        | Neuengammer                                         | $323.5 \pm 25.4$ | -53.0          | -235.8     | ----          |
|     | 19.10.2018         | 53.467774      | 10.19001        | Oil Storage Tank;<br>Randerseidet schleusendam (D2) | $323.5 \pm 25.4$ | -45.6          | -164       | $6.6 \pm 1.4$ |
|     | 11.11.2018         | 53.469045      | 10.188069       | Oil Storage Tank;<br>Neuengammer Hausdeich (D2)     | $175 \pm 1.4$    | -44.8          | -183.2     | $7.7 \pm 1.5$ |

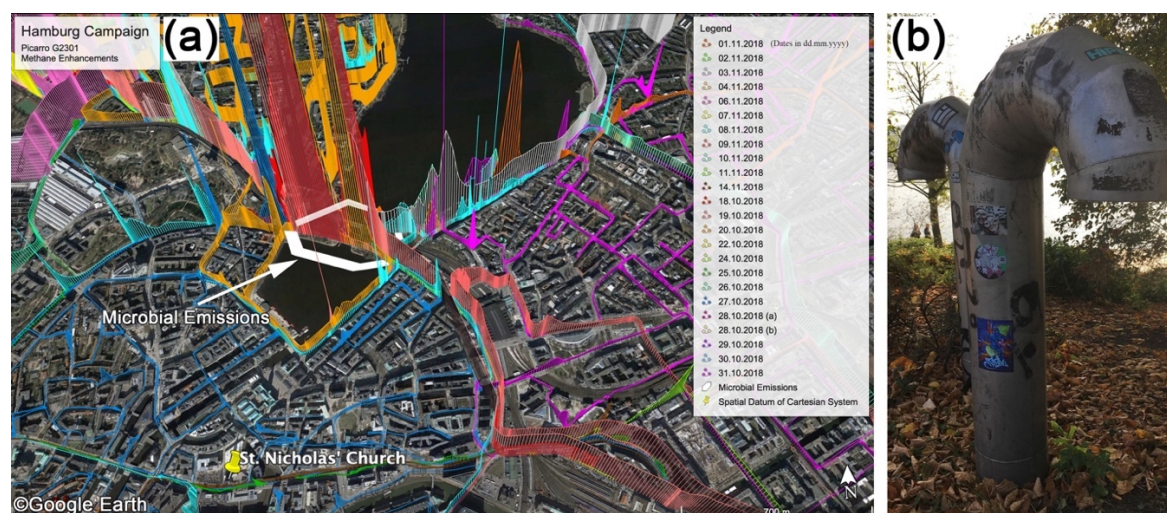

**Figure S15: (a)  $CH_4$  enhancements in the southern part of the Alster in Hamburg, the LIs inside the white polygon were attributed to a microbial source, and (b) the photograph shows an exhaust from the sewage system that was identified as strong  $CH_4$  source**



### S.3.4) Measurements inside the New Elbe Tunnel

During three surveys (07, 09, and 10 - November 2018), we drove inside the new Elbe tunnel to reach the south side of the Elbe river. Figure S16a-c show the CO<sub>2</sub> and CH<sub>4</sub> measurement time series during these passages, and Figure S16d shows a correlation of CO<sub>2</sub> and CH<sub>4</sub> enhancements above the background. The average CH<sub>4</sub>:CO<sub>2</sub> enhancement ratio inside the tunnel was  $0.2 \pm 0.1$  ppb:ppm which is in agreement with the ratio of 0.3 reported by Naus et al. (2018) for cars working under normal conditions.

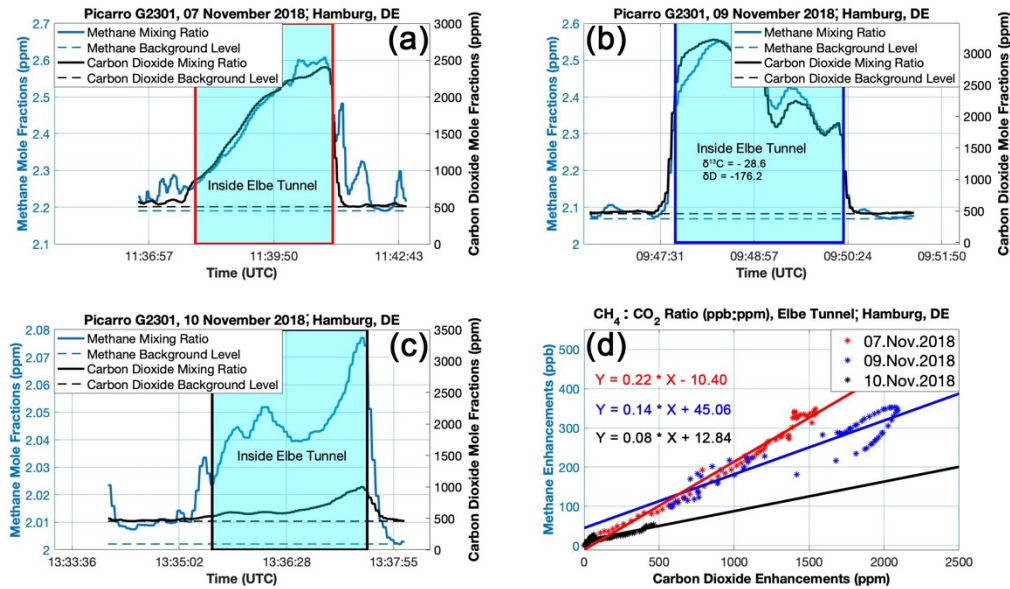

Figure S16: In situ measurements from G2301 during driving inside the new Elbe tunnel; (a) on 07 November 2018, (b) on 09 November 2018 including signatures from isotopic sampling analysis, (c) on 10 November 2018, and (d) CH<sub>4</sub>:CO<sub>2</sub> ratio of enhancements inside the tunnel

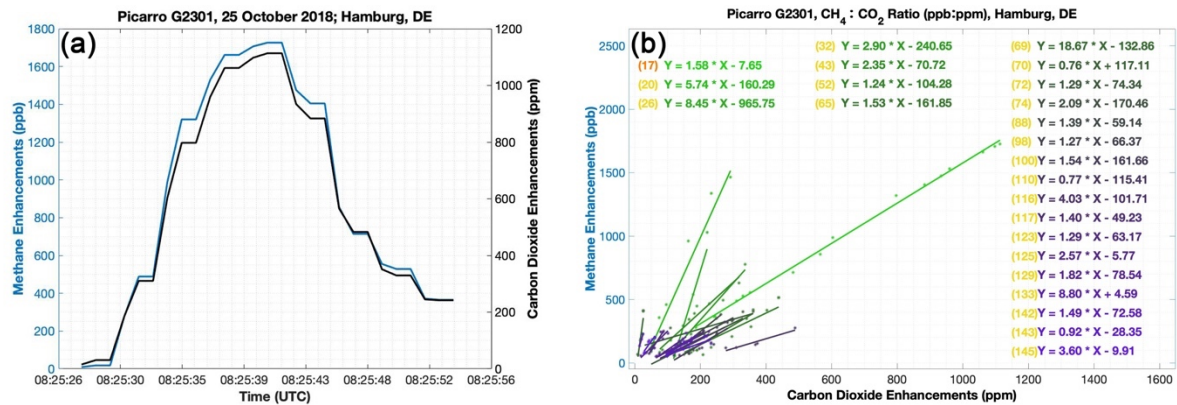

Figure S17: (a) Example of concomitant CH<sub>4</sub> and CO<sub>2</sub> enhancements for a LI measured with the G2301 instrument and (b) CH<sub>4</sub> and CO<sub>2</sub> correlations for the LIs attributed to combustion sources in Hamburg

## S.4) Standards, regulations, and LDC leak detection

### S.4.1) Standards and regulations for local gas companies in Germany

In this section, technical regulations on inspection of gas pipework systems with operation pressures up to 16 bar by Deutscher Verein des Gas- und Wasserfaches (DVGW) are provided (document DVGW G 465-1 to 4 (DVGW, 2019b)). Inspections are carried out with measurement equipment (according to DVGW G 465-4 (DVGW, 2019b)) while walking along the street/areas with pipelines in the ground. Inspections of pipelines follow a fixed schedule (Table S11).

**Table S11: Inspection intervals of gas pipes in the ground (Table 2 in DVGW G465-1 (DVGW, 2018))**

|                                                                           |                                                                    |            |          |
|---------------------------------------------------------------------------|--------------------------------------------------------------------|------------|----------|
| Leak frequency (Number of detected leaks per km monitored / checked pipe) | $\leq 0.1$                                                         | $\leq 0.5$ | $\leq 1$ |
| Operating pressure                                                        | Inspection interval in years                                       |            |          |
| $\leq 1$ bar                                                              | 6 (only for PE-pipes and pipes with cathodic corrosion protection) | 4          | 2        |
| $> 1$ bar to $\leq 5$ bar                                                 | 4 (additional bimonthly track inspection)                          | 2          | 1        |
| $> 5$ bar to $\leq 16$ bar                                                | 1 (depended on the material of the pipe)                           |            |          |

Leaks are classified into four categories based on proximity of the leaks to buildings, and each category requires certain actions to prevent incidents/accidents (DVGW, 2019a).

**Table S12: Leak classes and action required**

| Leak classification | Leak detection proximity to the building                   | Repairing actions                      |
|---------------------|------------------------------------------------------------|----------------------------------------|
| A1                  | Leak into a building                                       | Immediate                              |
| A2                  | Leak very close to a building                              | Within a week                          |
| B                   | Leak in bigger distance to a building                      | 3 months                               |
| C                   | There is no danger of incoming gas in a building or cavity | According to recommended recovery plan |

### S.4.2) Measurement procedures by GasNetz Hamburg

GasNetz Hamburg uses gas detectors from Sewerin (e.g. portable Ex-Tec PM4, detection limit 1 ppm above background). The analyzer sucks in air close to the ground and a person pushes the analyzer forward while online readings are available on a screen (Figure S18), while all the local gas distribution network pipelines are available and checked on site. All the 145 reported LIs were initially checked by GasNetz Hamburg by overlapping with the network map to see if the locations are in close proximity to pipeline from the NGDN. The LIs were prioritized in classes mentioned in Table S12, and finally leak detection and repair practices were carried out. The company not only checked the reported locations by this study, but also the surrounding area including house connections, parks, gardens, etc., where pipelines are located close by.

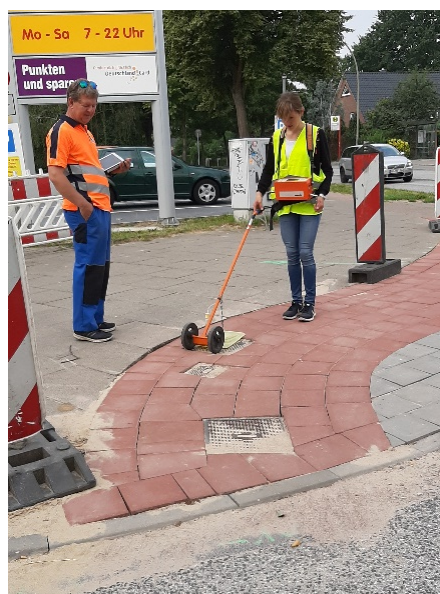

Figure S18: Leak detection operation by GasNetz Hamburg

Table S13: Distances of observed LIs from the natural gas distribution network grid

| Distance (m) | Red   | Orange | Yellow |
|--------------|-------|--------|--------|
| 0            | 100 % | 75 %   | 67 %   |
| 10           | ----- | 25 %   | 21 %   |
| 20           | ----- | -----  | 5 %    |
| 30           | ----- | -----  | 3 %    |
| 40           | ----- | -----  | 1 %    |
| 50           | ----- | -----  | 2 %    |

Table S14: Pipeline materials at the locations of observed LIs

| Pipeline material | Red   | Orange | Yellow |
|-------------------|-------|--------|--------|
| Steel             | 100 % | 67 %   | 63 %   |
| Polyethylene      | ----- | 33 %   | 37 %   |

### S.5) Gas Leak detection and repair

Mobile measurements provide enormous and valuable amount of data in a short period of time with an ability of large coverage in urban area for the purpose of detecting and quantifying leaks from NGDNs. This study shows that CH<sub>4</sub> mobile measurements associated with several attribution techniques are capable of distinguishing fossil LIs. In this study, we added source attribution techniques to an algorithm which was initially designed to detect and quantify leaks from pipeline. This algorithm was introduced in von Fischer et al. (2017), and later improved in Weller et al. (2019); Figure S8 shows the steps we followed in this study to detect, quantify, and attribute CH<sub>4</sub> emissions in urban area. We concluded that the attribution techniques we used to distinguish fossil-related sources are effective. Mobile CO<sub>2</sub> and C<sub>2</sub>H<sub>6</sub> enhancements to eliminate non-fossil LIs is effective in locating the most potential signals related which indicate leaks from pipelines. Analyzing isotopic samples ( $\delta^{13}\text{C}$  and  $\delta\text{D}$ ) provides detailed information on the origin of emission sources, however it is time-consuming effort and not possible to take samples from all locations where we observed CH<sub>4</sub> enhancements. In Figure S19, we provide a flowchart based on the findings of this study and experiences we obtained by collaboration with GasNetz Hamburg and STEDIN Utrecht to locate NGDNs leaks. In this flowchart we suggest to combine mobile measurements and attribution (blue box) to report potential gas leaks to local utilities before current repair practice (green box).

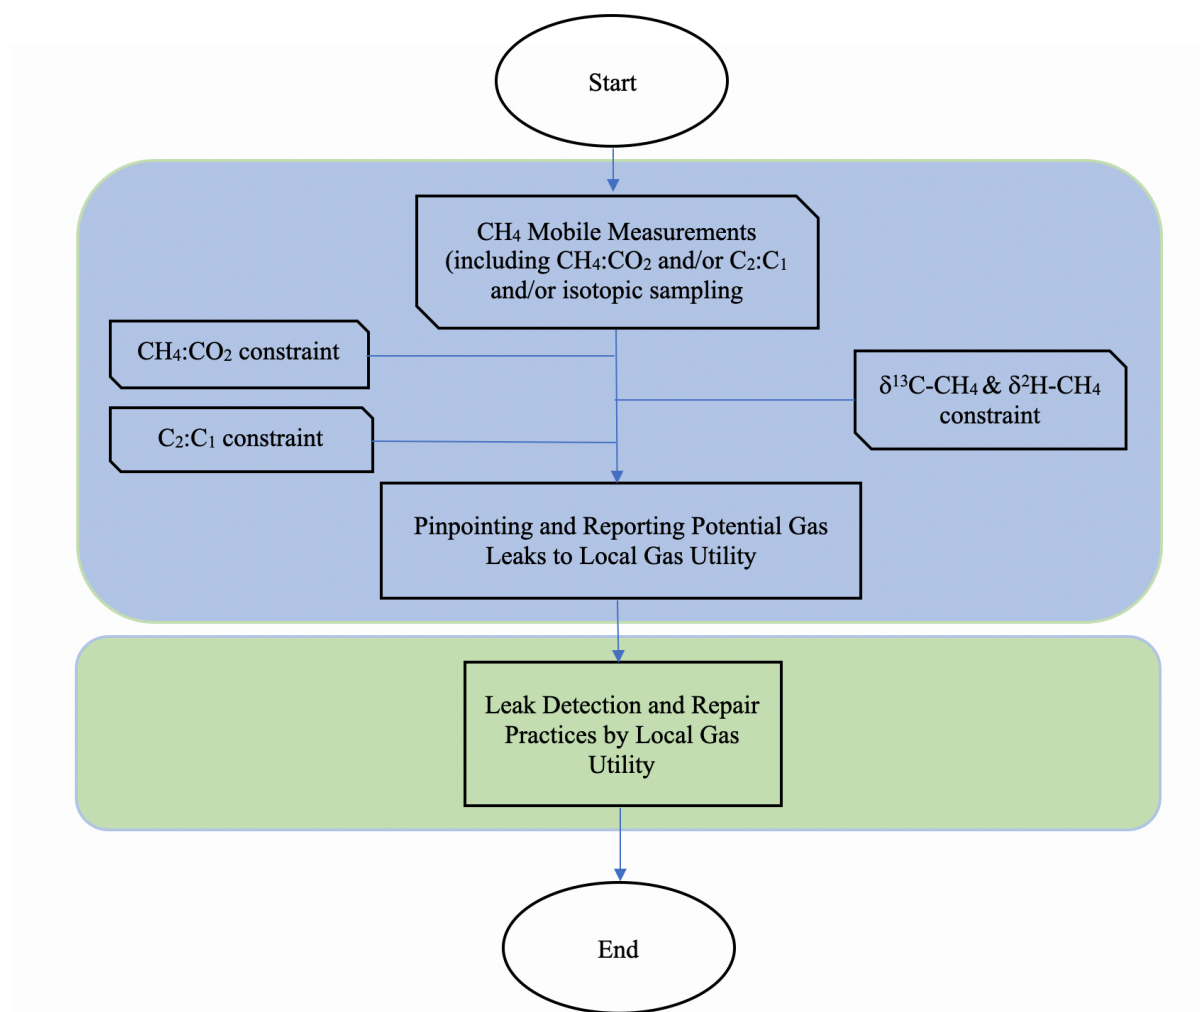

Figure S19: Gas detection and repair practices flowchart

## References in SI

- Bright, E. A., Coleman, P. R. and Dobson, J. E.: LandScan : A Global Population database for estimating populations at risk, [online] Available from: <https://www.semanticscholar.org/paper/LandScan-%3A-A-Global-Population-database-for-at-risk-Bright-Coleman/17e6076b6761788684434d1e14e85e8877fc0146> (Accessed 23 September 2019), 2000.
- DVGW: Technische Regel-Arbeitsblatt; DVGW G465-1 (A). [online] Available from: [https://shop.wvgw.de/var/assets/leseprobe//510544\\_lp\\_G 465-1\\_2019\\_05.pdf](https://shop.wvgw.de/var/assets/leseprobe//510544_lp_G 465-1_2019_05.pdf), 2018.
- DVGW: Technische Mitteilungen Hinweis; DVGW G 465-3. [online] Available from: [https://shop.wvgw.de/var/assets/leseprobe//510545\\_lp\\_G 465-3\\_2019\\_05.pdf](https://shop.wvgw.de/var/assets/leseprobe//510545_lp_G 465-3_2019_05.pdf), 2019a.
- DVGW: Technischer Hinweis - Merkblatt; DVGW G465-4 (M). [online] Available from: [https://shop.wvgw.de/var/assets/leseprobe//510546\\_lp\\_G 465-4\\_2019\\_05.pdf](https://shop.wvgw.de/var/assets/leseprobe//510546_lp_G 465-4_2019_05.pdf), 2019b.
- Hopkins, F. M., Kort, E. A., Bush, S. E., Ehleringer, J. R., Lai, C.-T., Blake, D. R. and Randerson, J. T.: Spatial patterns and source attribution of urban methane in the Los Angeles Basin, *J. Geophys. Res. Atmos.*, 121(5), 2490–2507, doi:10.1002/2015JD024429, 2016.
- Naus, S., Röckmann, T. and Popa, M. E.: The isotopic composition of CO in vehicle exhaust, *Atmos. Environ.*, 177, 132–142, doi:10.1016/J.ATMOSENV.2018.01.015, 2018.
- Maazallahi, H., Fernandez, J. M., Menoud, M., Zavala-Araiza, D., Weller, Z. D., Schwietzke, S., von Fischer, J. C., Denier van der Gon, H., and Röckmann, T.: MATLAB® code for evaluation of Urban Surveys, Zenodo, doi: 10.5281/zenodo.3928972, 2020.
